# Supplementary material
Source: Research Square preprint supplement (doi:10.21203/rs.3.rs-9241346/v1)
Supplement: Supplementary file 1 [file eca44c7a3896199de1c45778.pdf]

## Supporting Information

### Topology-Resolved Imaging of Mitochondrial Nucleoids Uncovers Dynamic G-Quadruplex Remodeling

Xin-Ru Hu<sup>1,5</sup>, Yan Lin<sup>2,5</sup>, Meng-Di Chen<sup>1</sup>, Man Zhang<sup>1</sup>, Eunji Kim<sup>3</sup>, Jungryun Kim<sup>3</sup>, Fuchen Liu<sup>2</sup>, Kunqian Ji<sup>2</sup>, Zhiqiang Liu<sup>1</sup>, Chuanzhu Yan<sup>2</sup>, Yunjie Xu<sup>3,\*</sup>, Xiaoqiang Yu<sup>1,\*</sup>, Jong Seung Kim<sup>3,4\*</sup>, and Kang-Nan Wang<sup>1,\*</sup>

<sup>1</sup>State Key Laboratory of Crystal Materials, Shandong University, Jinan 250100, China

<sup>2</sup>Department of Neurology, Shandong Key Laboratory of Mitochondrial Medicine and Rare Diseases, Research Institute of Neuromuscular and Neurodegenerative Diseases, Qilu Hospital of Shandong University, Jinan, Shandong, China

<sup>3</sup>Department of Chemistry, Korea University, Seoul 02841, Korea

<sup>4</sup>National Research Laboratory for Convergence Degradation Biology, Korea University, Seoul 02841, Korea

<sup>5</sup>These authors have contributed equally to this work

\* [xuyunjie87@korea.ac.kr](mailto:xuyunjie87@korea.ac.kr) (Y.J. Xu); [yuxq@sdu.edu.cn](mailto:yuxq@sdu.edu.cn) (X. Q. Yu); [jongskim@korea.ac.kr](mailto:jongskim@korea.ac.kr) (J. S. Kim); [wangkn@sdu.edu.cn](mailto:wangkn@sdu.edu.cn) (K.-N. Wang).

## Contents

|                               |    |
|-------------------------------|----|
| Experimental procedures ..... | 4  |
| Supplementary Figures .....   | 5  |
| Fig. S1. ....                 | 5  |
| Fig. S2. ....                 | 5  |
| Fig. S3. ....                 | 6  |
| Fig. S4. ....                 | 6  |
| Fig. S5. ....                 | 7  |
| Fig. S6. ....                 | 7  |
| Fig. S7. ....                 | 8  |
| Fig. S8. ....                 | 8  |
| Fig. S9. ....                 | 9  |
| Fig. S10. ....                | 9  |
| Fig. S11. ....                | 10 |
| Fig. S12. ....                | 11 |
| Fig. S13. ....                | 12 |
| Fig. S14. ....                | 13 |
| Fig. S15. ....                | 13 |
| Fig. S16. ....                | 13 |
| Fig. S17. ....                | 14 |
| Fig. S18. ....                | 15 |
| Fig. S19. ....                | 14 |
| Fig. S20. ....                | 16 |
| Fig. S21. ....                | 17 |
| Fig. S22. ....                | 17 |
| Fig. S23. ....                | 18 |
| Fig. S24. ....                | 18 |
| Fig. S25. ....                | 19 |

|                |    |
|----------------|----|
| Fig. S26. .... | 19 |
| Fig. S27. .... | 20 |
| Fig. S28. .... | 20 |
| Fig. S29. .... | 21 |
| Fig. S30. .... | 21 |
| Fig. S31. .... | 22 |
| Fig. S32. .... | 22 |
| Fig. S33. .... | 23 |
| Fig. S34. .... | 23 |
| Fig. S35. .... | 23 |
| Table S1. .... | 24 |
| Table S2. .... | 25 |
| Table S3. .... | 26 |
| Table S4. .... | 27 |
| Table S5. .... | 28 |

## Experimental procedures

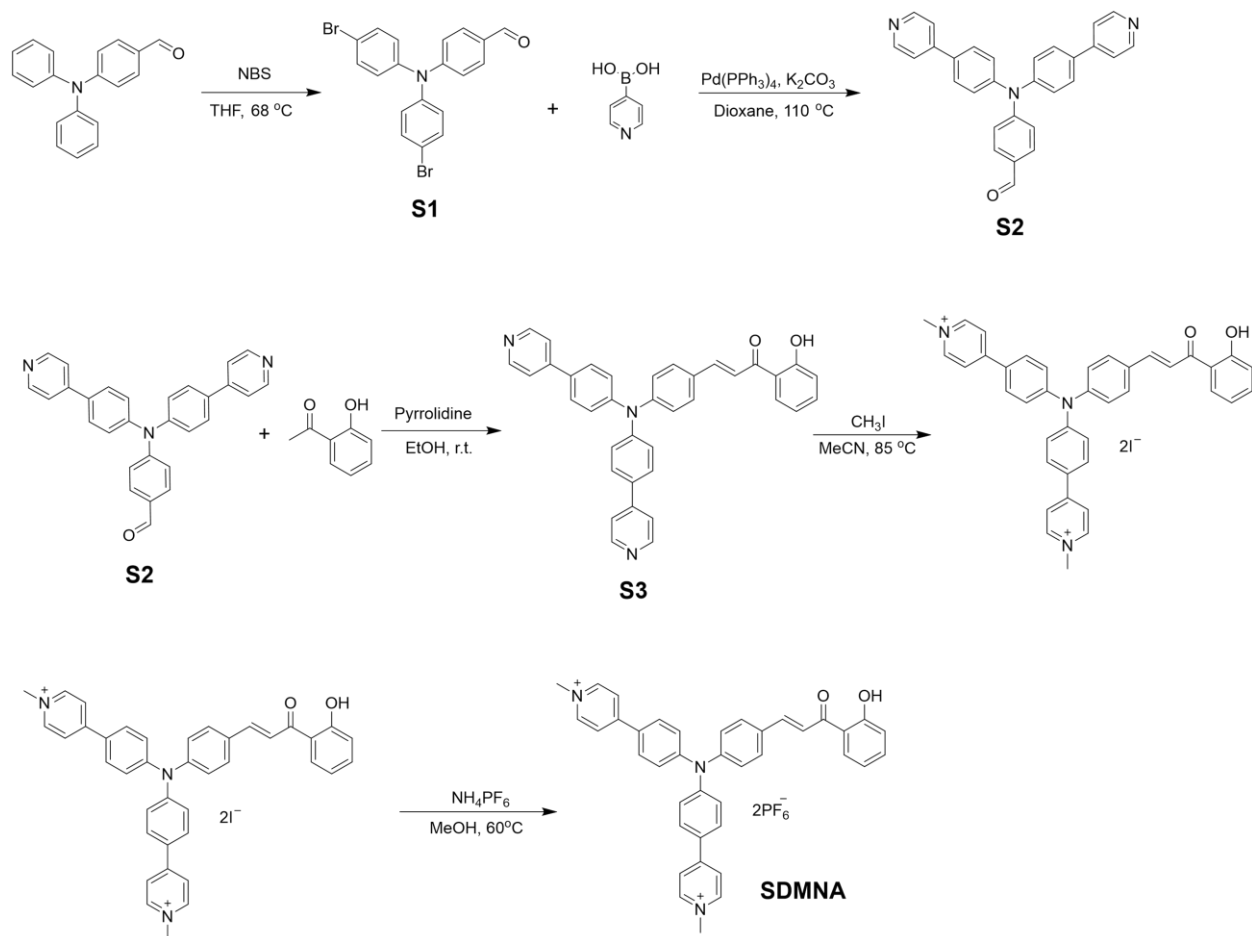

**Scheme S1.** Synthetic route to SDMNA.

Supplementary Figures.

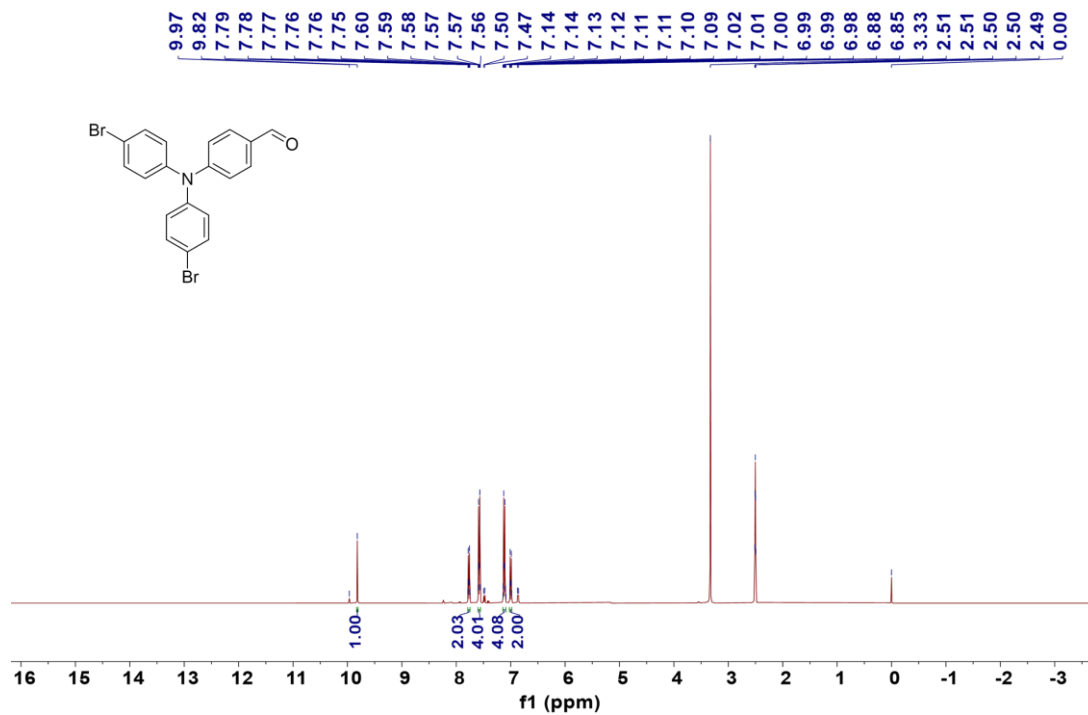

Fig. S1. <sup>1</sup>H NMR spectra of S1 in DMSO-*d*<sub>6</sub>.

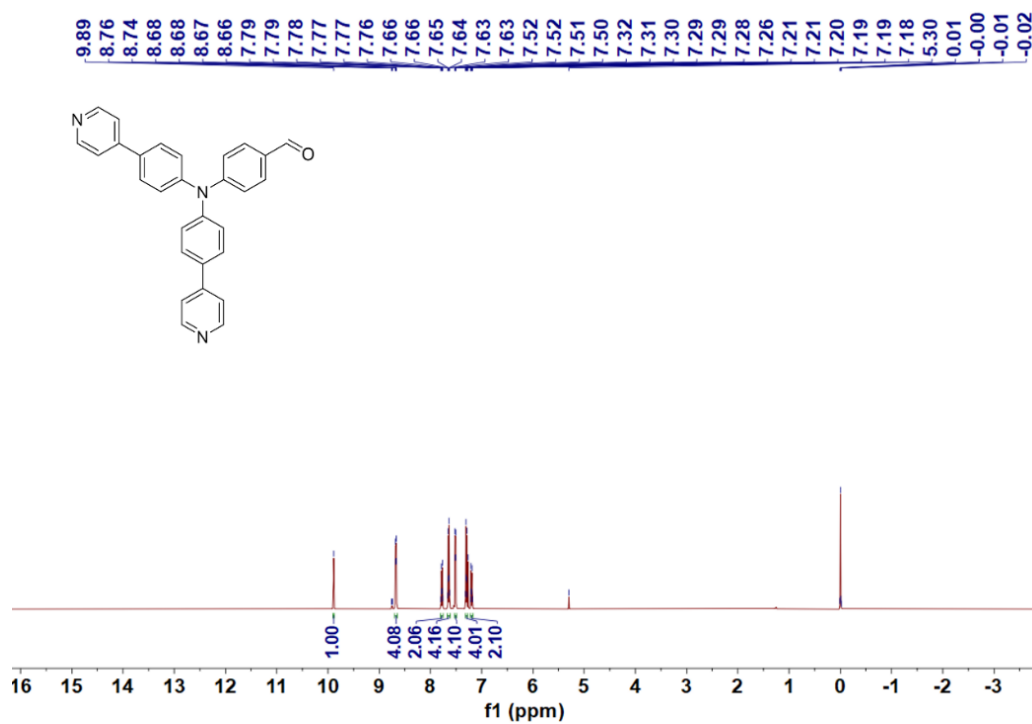

Fig. S2. <sup>1</sup>H NMR spectra of S2 in Chloroform-*d*.

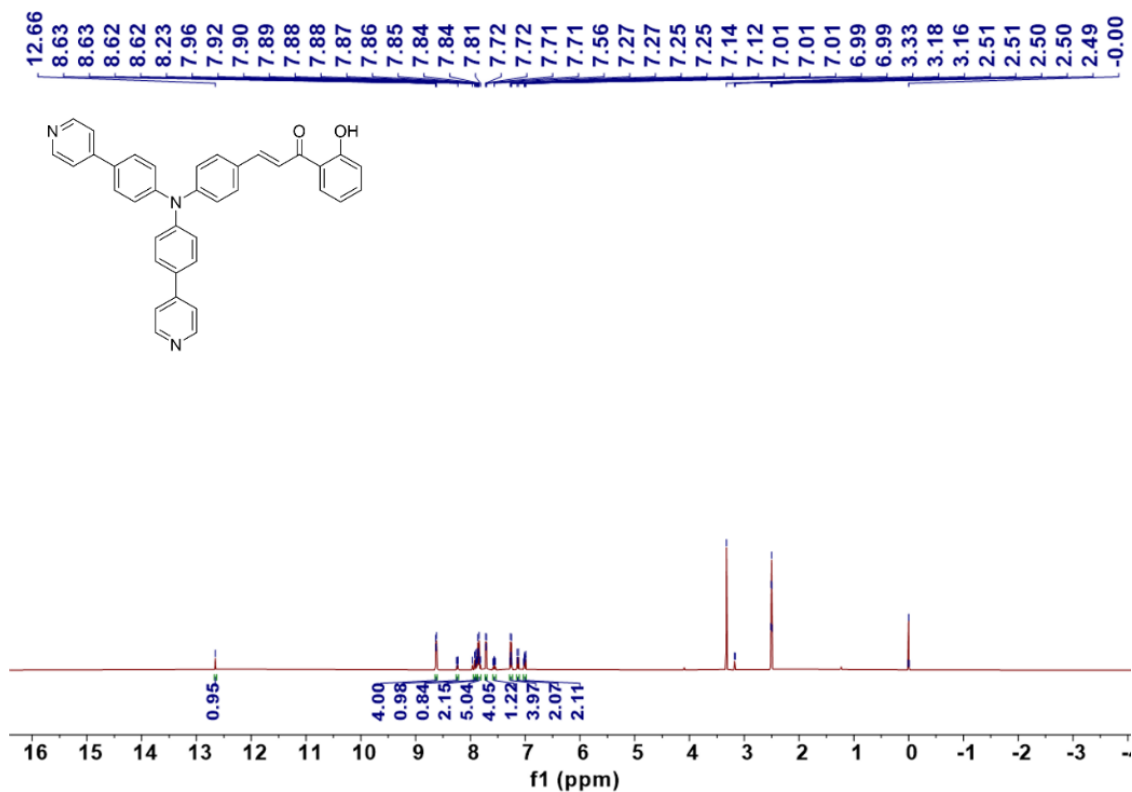

Fig. S3.  $^1\text{H}$  NMR spectra of S3 in  $\text{DMSO-}d_6$ .

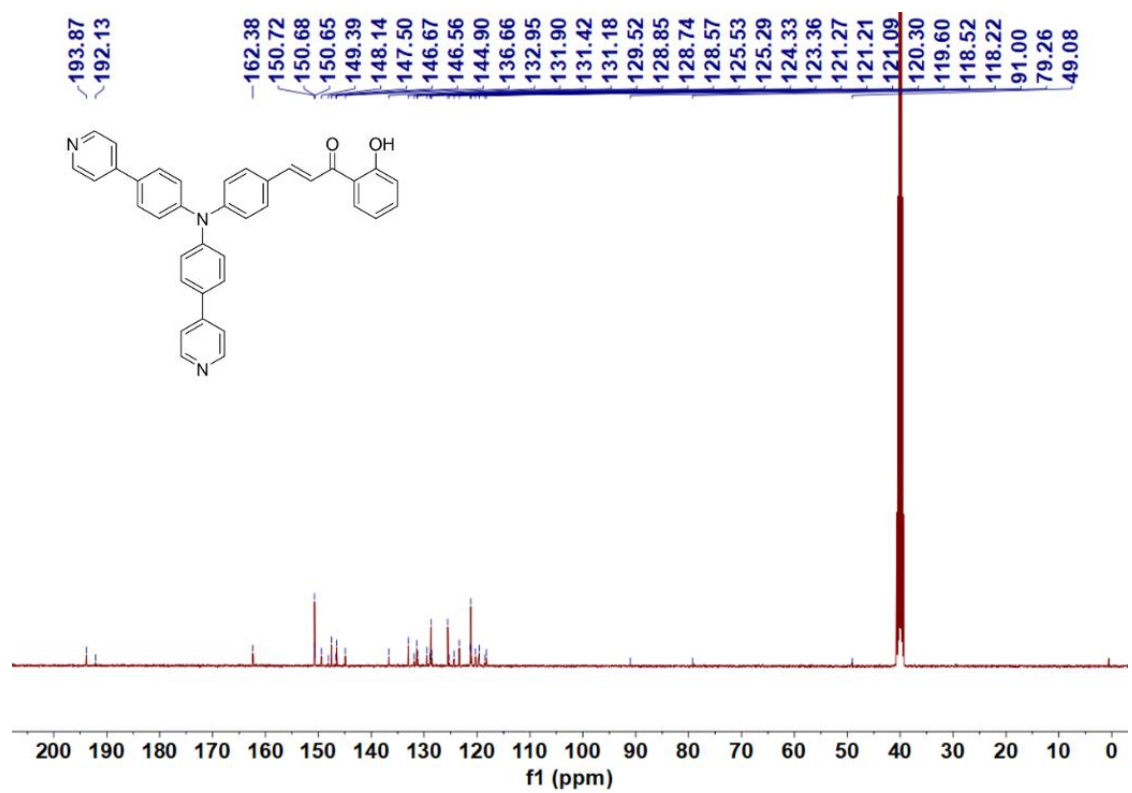

Fig. S4.  $^{13}\text{C}$  NMR spectra of S3 in  $\text{DMSO-}d_6$ .

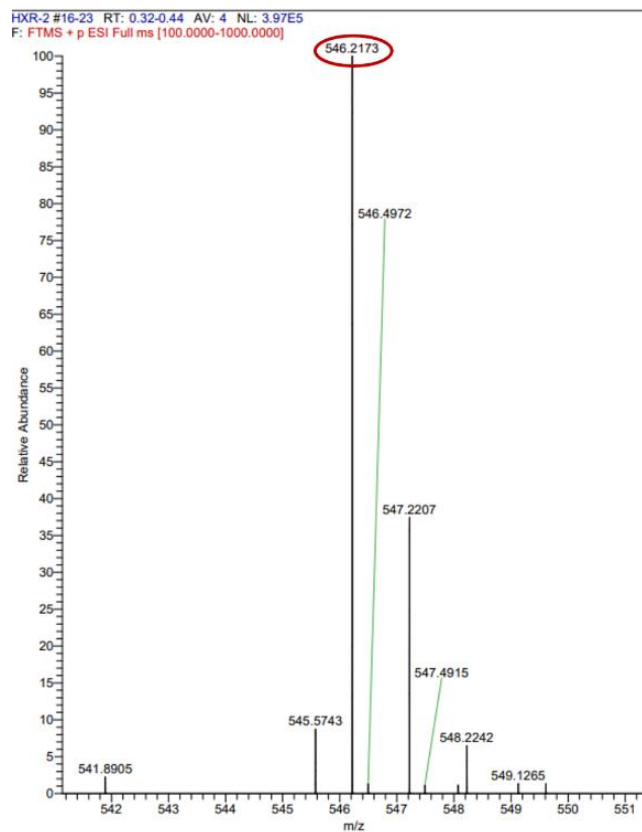

Fig. S5. HRMS of S3 in  $\text{CH}_2\text{Cl}_2$ .

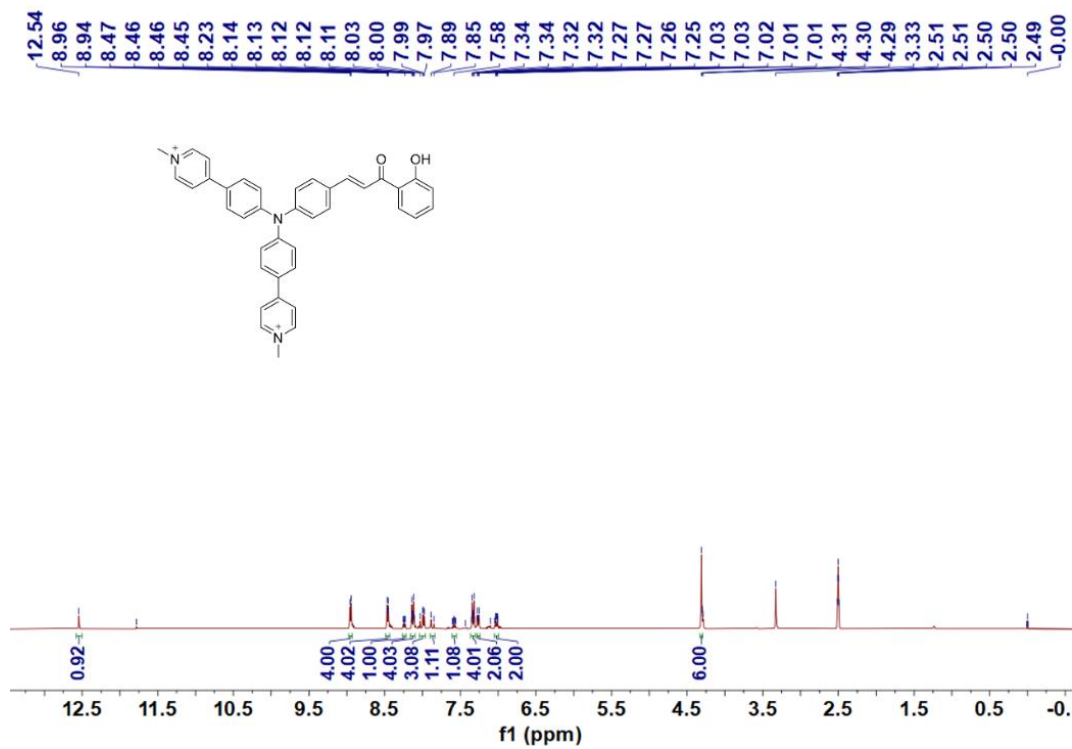

Fig. S6.  $^1\text{H}$  NMR spectra of SDMNA in  $\text{DMSO}-d_6$ .

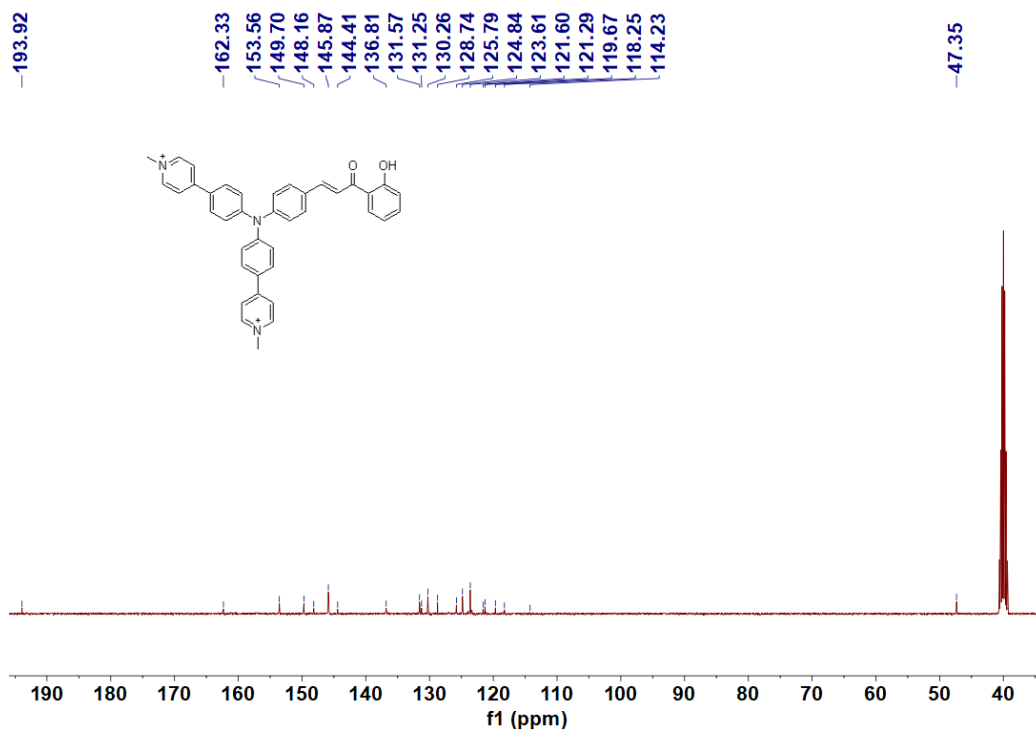

Fig. S7. <sup>13</sup>C NMR spectra of SDMNA in DMSO-*d*<sub>6</sub>.

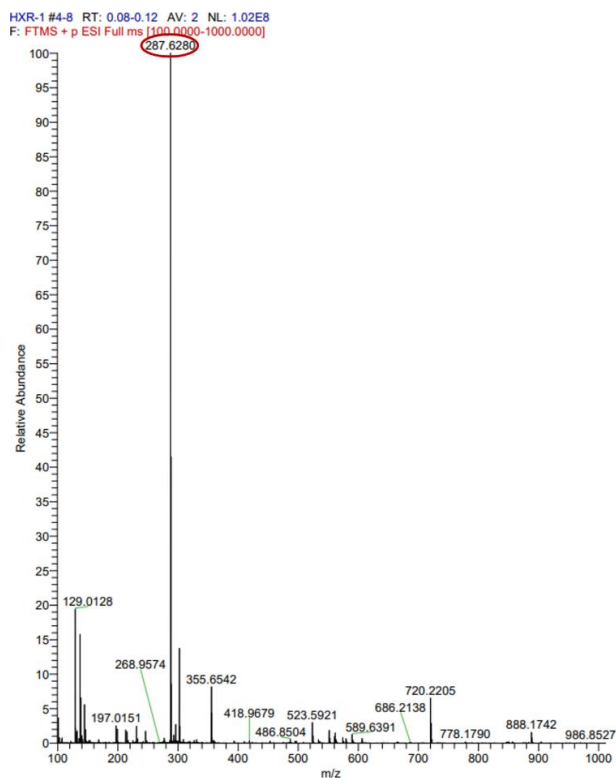

Fig. S8. HRMS of SDMNA in CH<sub>2</sub>Cl<sub>2</sub>.

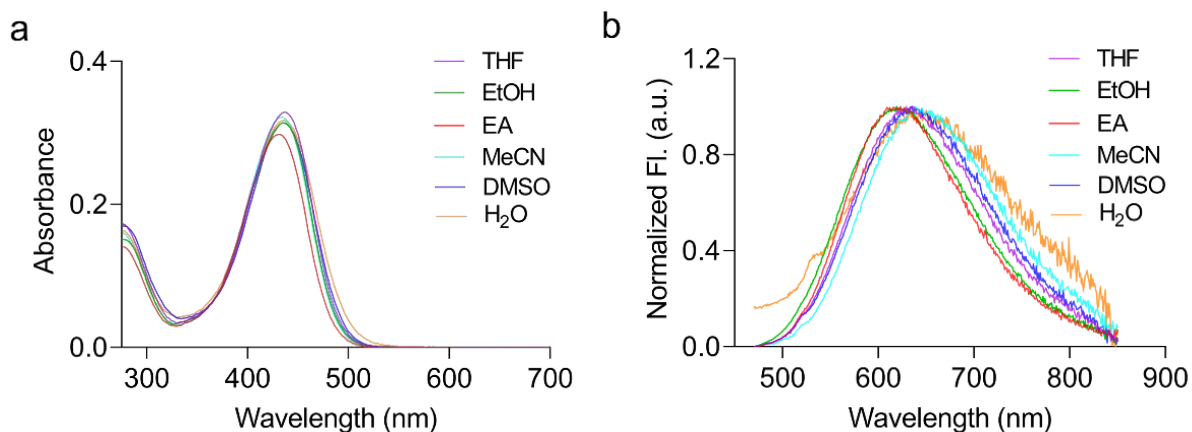

**Fig. S9.** Absorption (a) and fluorescence emission (b) spectra of SDMNA in different solvents: tetrahydrofuran (THF), ethanol (EtOH), ethyl acetate (EA), acetonitrile (MeCN), dimethyl sulfoxide (DMSO), and H<sub>2</sub>O.  $\lambda_{\text{ex}} = 450$  nm.

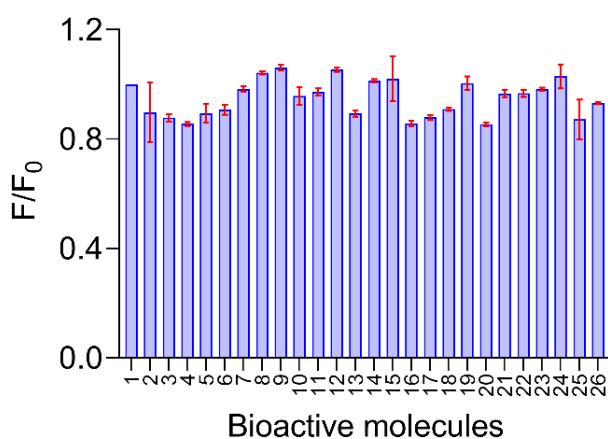

**Fig. S10.** Fluorescence intensity changes of SDMNA in ultrapure water in the presence of various inorganic ions and biological molecules (1: Control (H<sub>2</sub>O), 2: CH<sub>3</sub>COONa, 3: CuCl<sub>2</sub>, 4: CuCN, 5: K<sub>2</sub>CO<sub>3</sub>, 6: KCl, 7: MgSO<sub>4</sub>, 8: Na<sub>2</sub>HPO<sub>4</sub>, 9: Na<sub>2</sub>SO<sub>4</sub>, 10: Na<sub>3</sub>PO<sub>4</sub>, 11: NaBr, 12: NaCl, 13: NaF, 14: NaH<sub>2</sub>PO<sub>4</sub>, 15: NaHCO<sub>3</sub>, 16: NaHS, 17: NaHSO<sub>3</sub>, 18: NaI, 19: NaOH, 20: NH<sub>4</sub>Cl, 21: Gln, 22: Asp, 23: His, 24: Cys, 25: GSH, 26: Glucose).

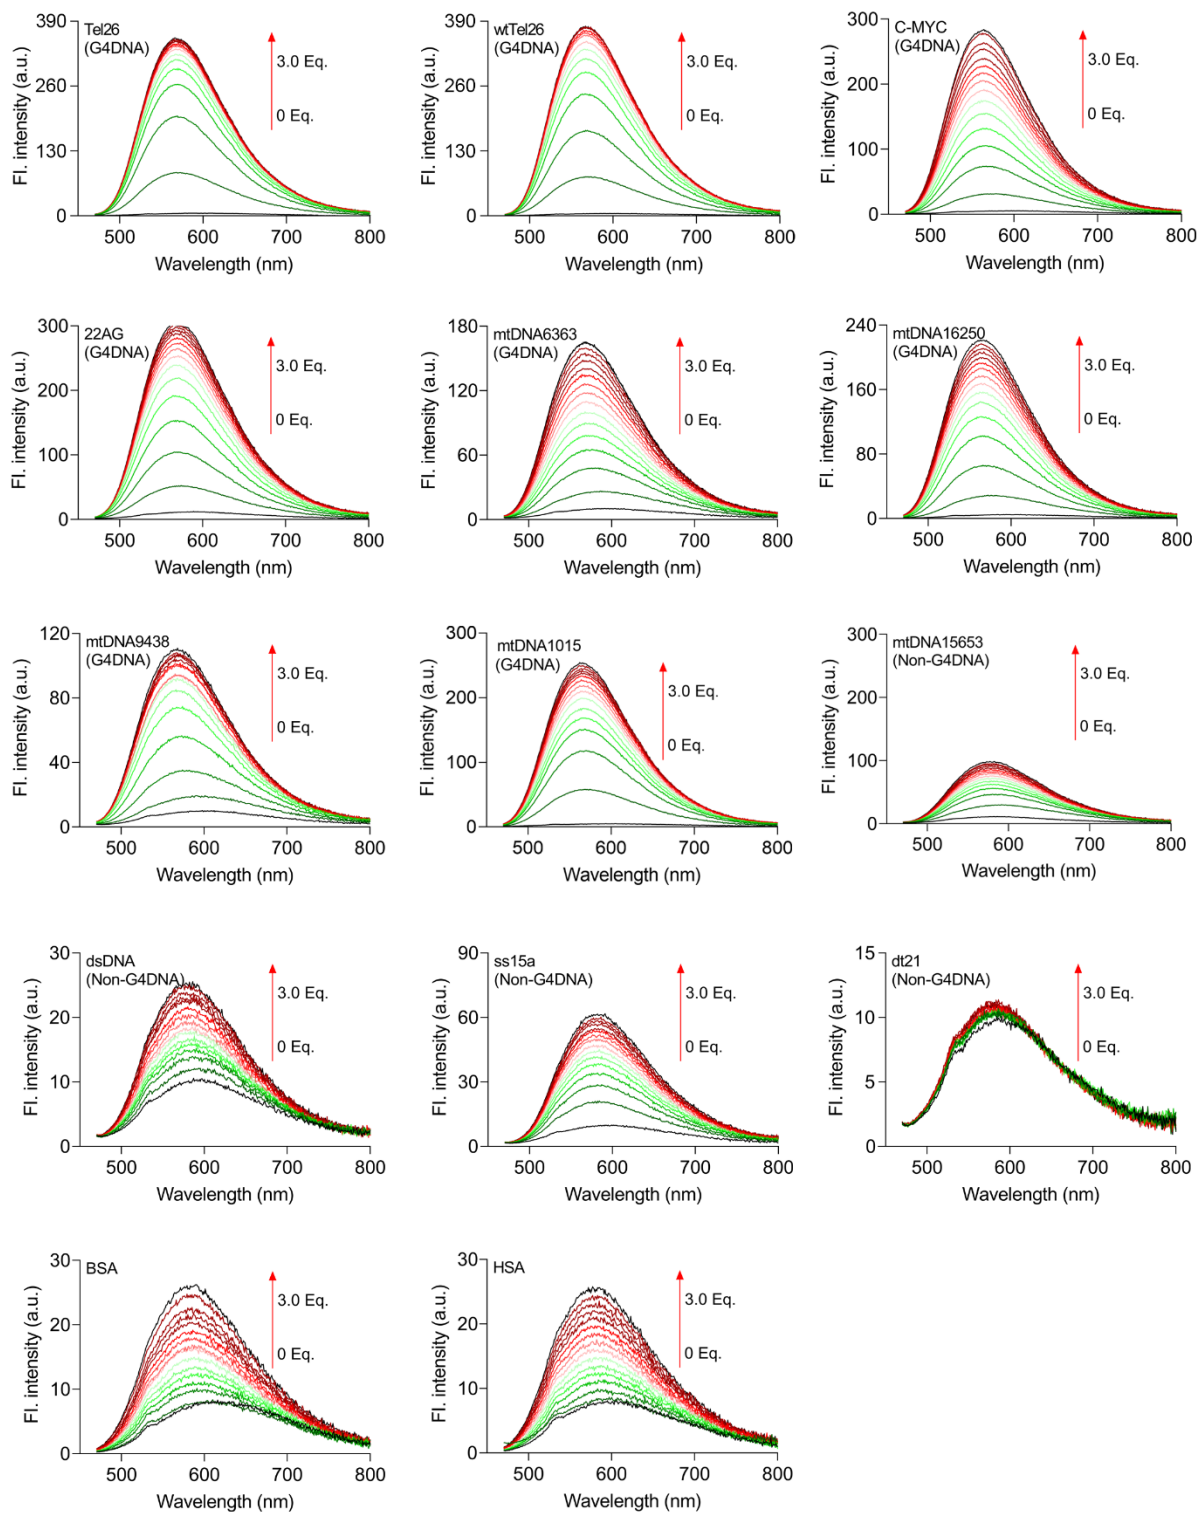

**Fig. S11.** Fluorescence emission spectra of SDMNA (1  $\mu\text{M}$ ) upon titration with different DNA topologies in 10 mM Tris-HCl buffer (pH 7.4, 100 mM  $\text{K}^+$ ) at  $\lambda_{\text{ex}} = 450$  nm.

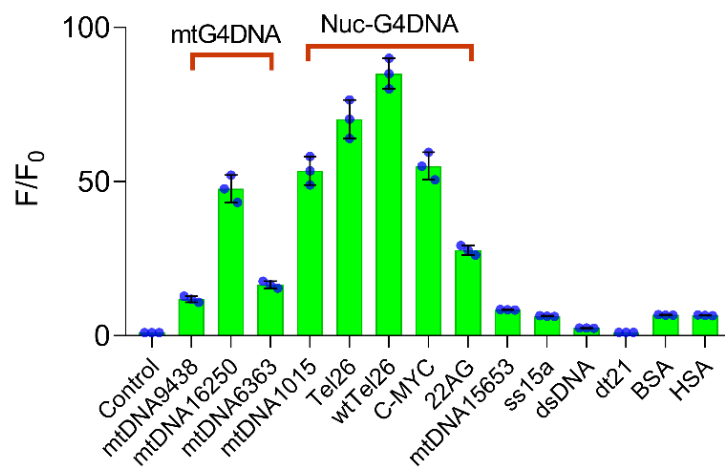

**Fig. S12.** Relative fluorescence intensity ratios of SDMNA interacting with different DNA topologies at an SDMNA: DNA molar ratio of 3:1 in 10 mM Tris-HCl buffer (pH 7.2, 100 mM K<sup>+</sup>),  $\lambda_{\text{ex}} = 450$  nm.

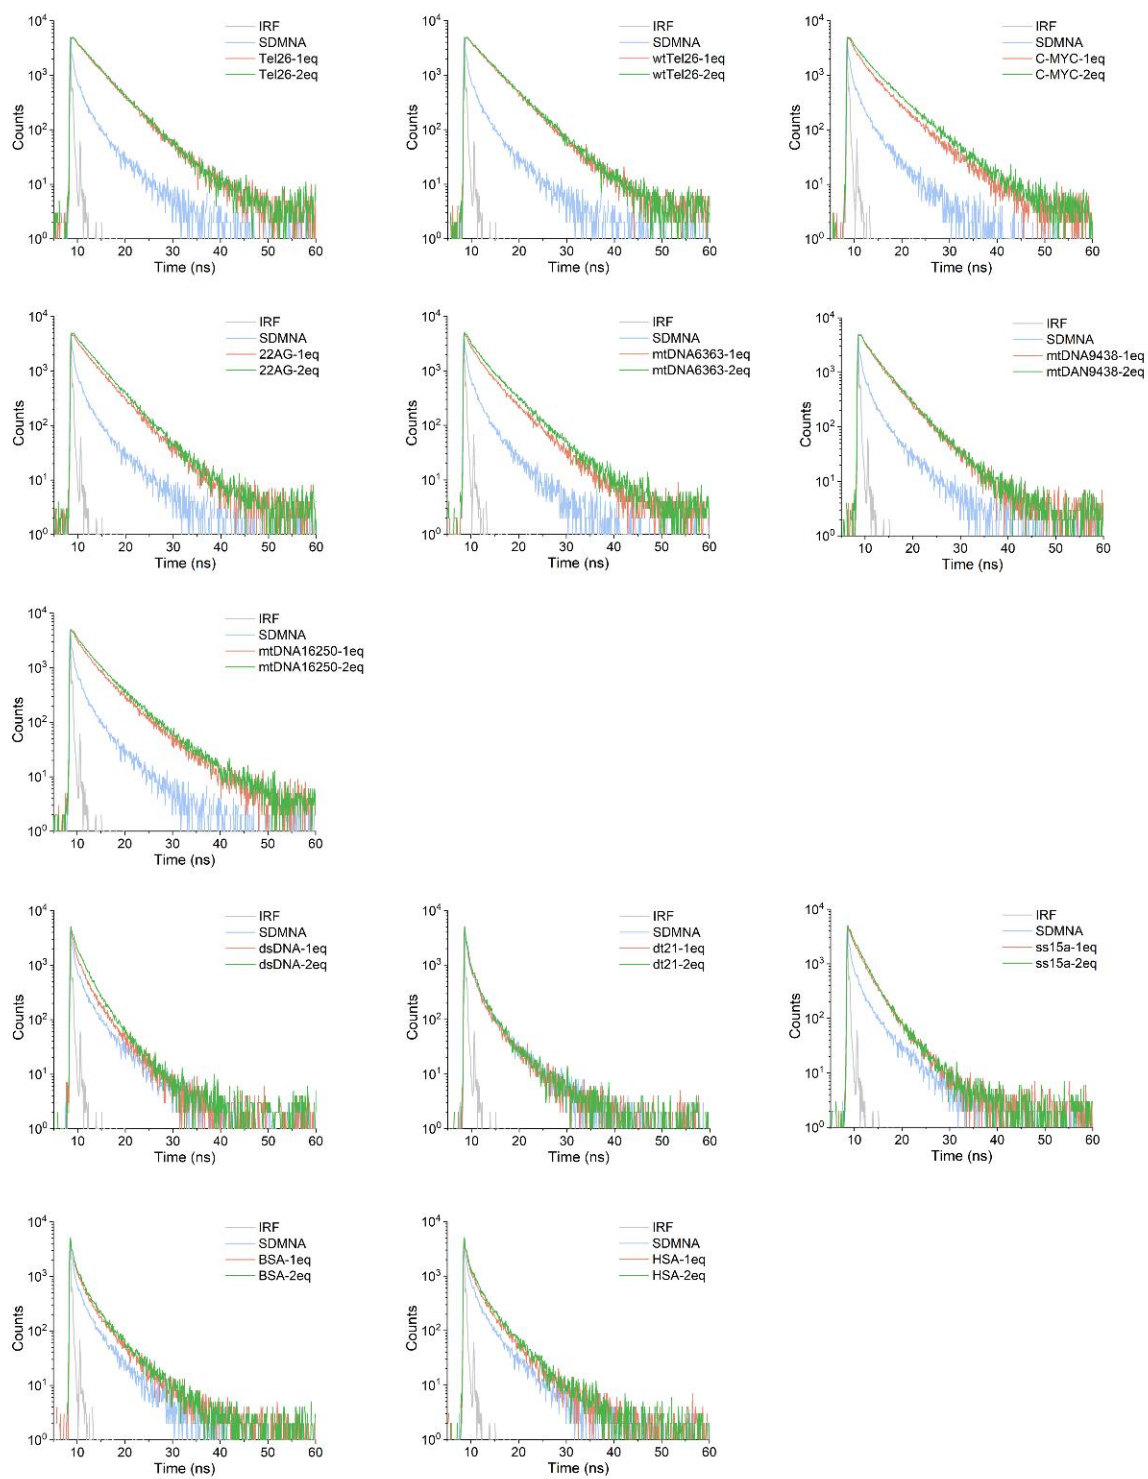

**Fig. S13.** Fluorescence lifetime decay curves of SDMNA (1  $\mu$ M) upon titration with different DNA topologies in 10 mM Tris-HCl buffer (pH 7.4, 100 mM  $K^+$ ).  $\lambda_{ex} = 445$  nm,  $\lambda_{em} = 570$  nm.

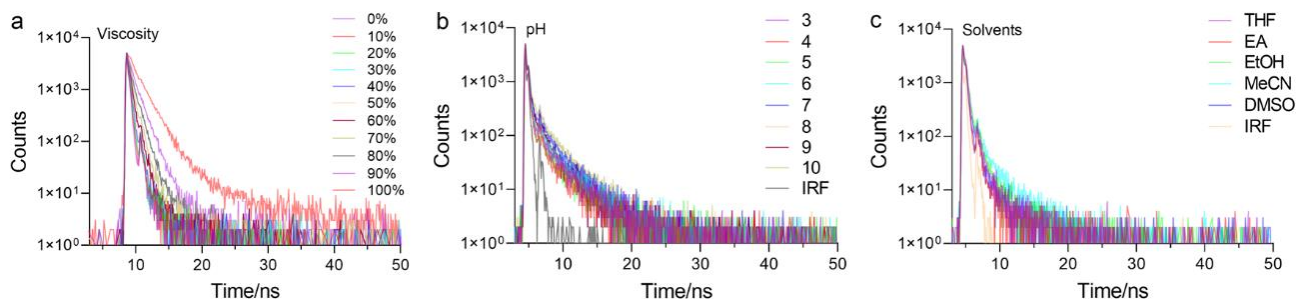

**Fig. S14.** Fluorescence lifetime decay curves of SDMNA measured under different viscosity, pH, and solvent environments.  $\lambda_{\text{ex}} = 445 \text{ nm}$ ,  $\lambda_{\text{em}} = 570 \text{ nm}$ .

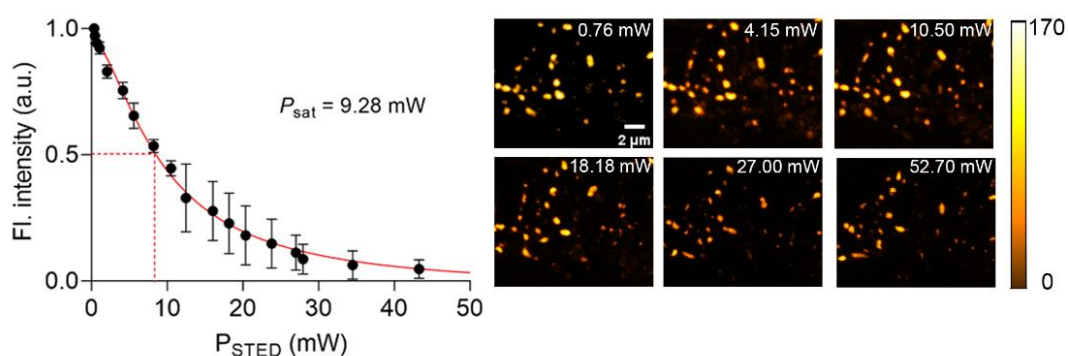

**Fig. S15.** STED images of SDMNA ( $2 \mu\text{M}$ ) in COS-7 cells acquired under different depletion laser powers using a 775 nm depletion beam. Right: plot of normalized fluorescence intensity of SDMNA ( $2 \mu\text{M}$ ) in COS-7 cells as a function of STED depletion laser power.  $\lambda_{\text{ex}} = 488 \text{ nm}$ ;  $\lambda_{\text{em}} = 575\text{-}625 \text{ nm}$ ,  $\lambda_{\text{STED}} = 775 \text{ nm}$ .

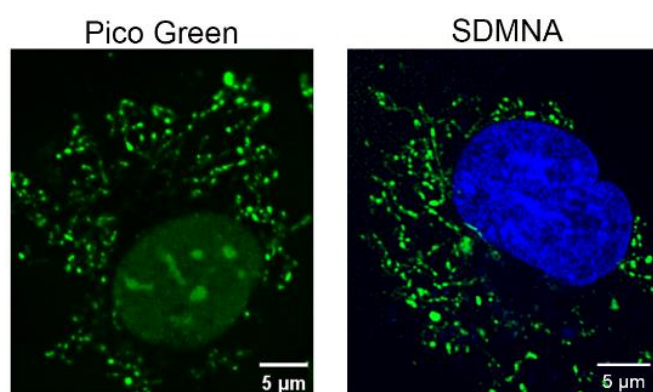

**Fig. S16.** Comparison of PicoGreen staining (left) and SDMNA staining (right, co-labeled with Hoechst 33342) in COS-7 cells. PicoGreen,  $\lambda_{\text{ex}} = 488 \text{ nm}$ ,  $\lambda_{\text{em}} = 575\text{-}625 \text{ nm}$ ; SDMNA,  $\lambda_{\text{ex}} = 488 \text{ nm}$ ,  $\lambda_{\text{em}} = 575\text{-}625 \text{ nm}$ ; Hoechst33342,  $\lambda_{\text{ex}} = 405 \text{ nm}$ ,  $\lambda_{\text{em}} = 420\text{-}475 \text{ nm}$ .

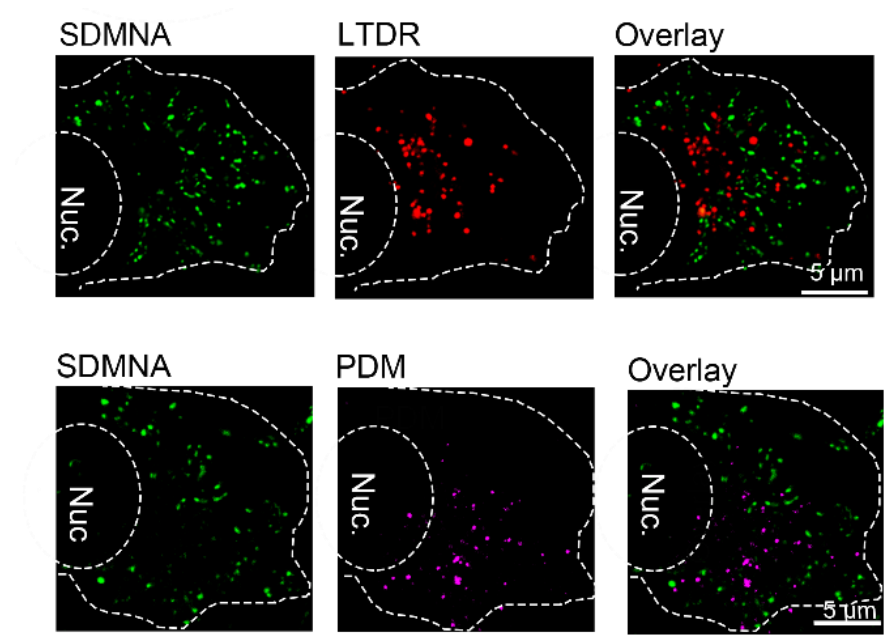

**Fig. S17.** Colocalization experiment of SDMNA (2  $\mu$ M, 2 h) with LysoTracker Deep Red (LTDR, 200 nM) and PDM (1  $\mu$ M, 30 min) in COS-7 cells, respectively.

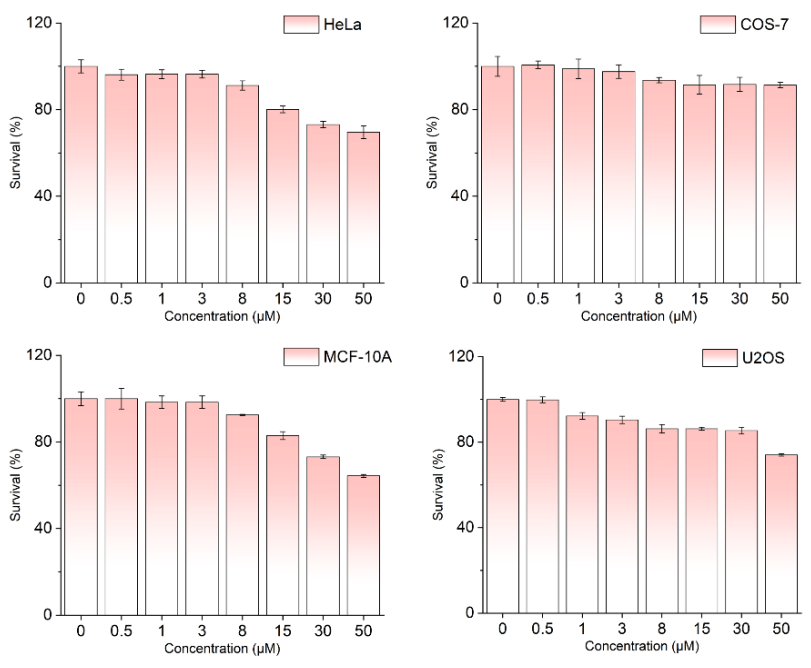

**Fig. S18.** Cytotoxicity of SDMNA at various concentrations in HeLa, COS-7, MCF-10A, and U2OS cells after 24 h of incubation.

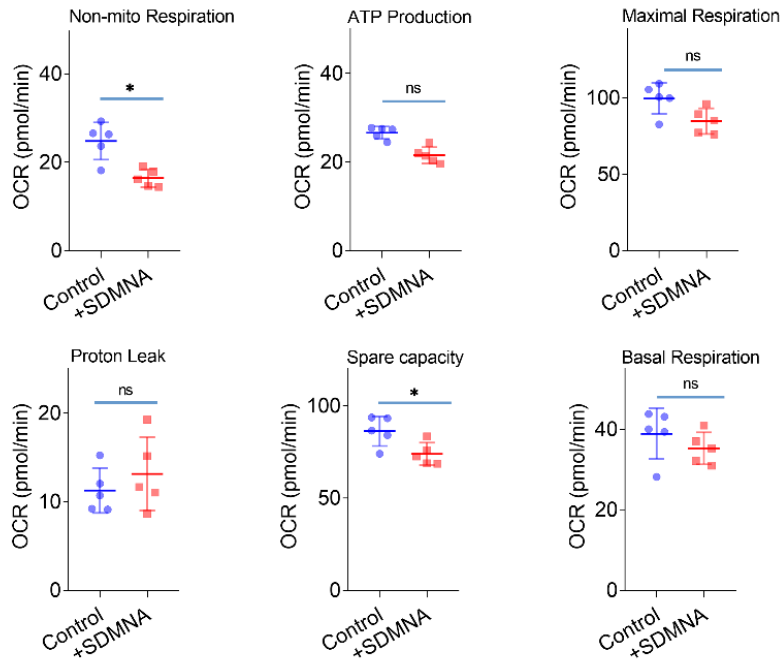

**Fig. S19.** OCR traces and corresponding bar graphs indicate comparable basal respiration, ATP production, maximal respiration, proton leak, non-mitochondrial respiration, and spare respiratory capacity, as shown in Fig. 2h.

U2OS

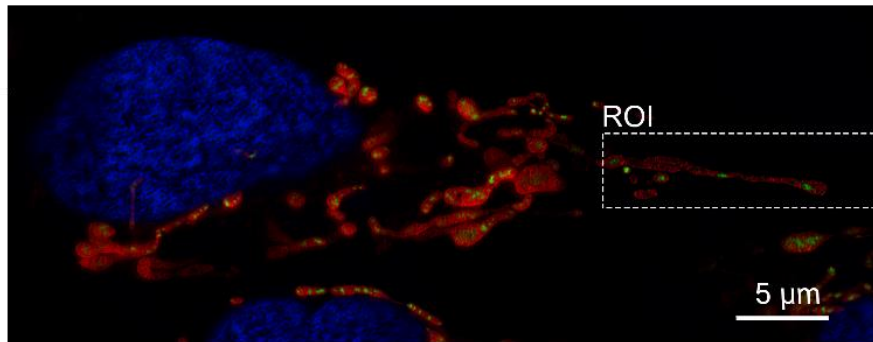

MCF-10A

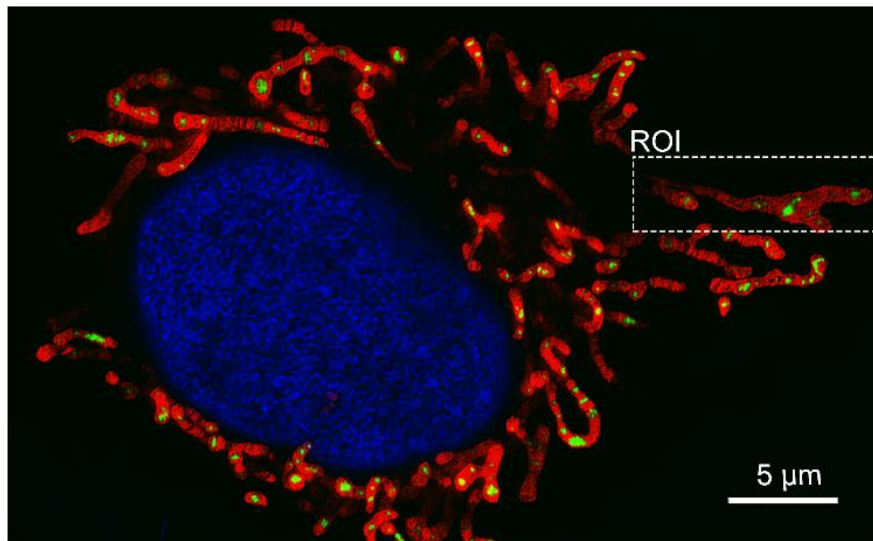

**Fig. S20.** STED imaging of mitochondrial inner membrane and mtDNA was performed using PKMO and SDMNA in different cell types (U2OS and MCF-10A). The ROI magnification areas are shown in Figs. 2i-2j.

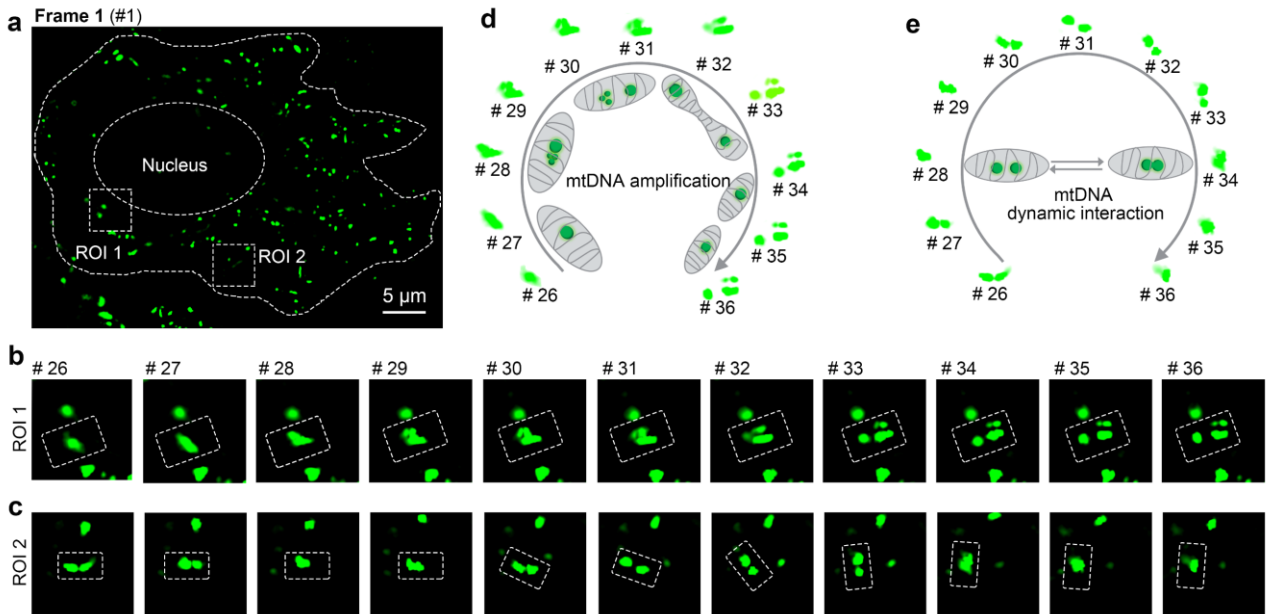

**Fig. S21.** Long-term dynamic imaging of mtDNA using SDMNA. (a) Time-lapse ultrafast structured illumination microscopy (SIM) imaging of fluorescently labeled mtDNA in living cells stained with SDMNA. (b, c) Frame-by-frame analysis of mtDNA dynamics within ROI 1 (b) and ROI 2 (c) from (a). (d, e) Schematic illustrations depicting mtDNA replication events (d) and transient dynamic interactions between adjacent mtDNA copies (e).

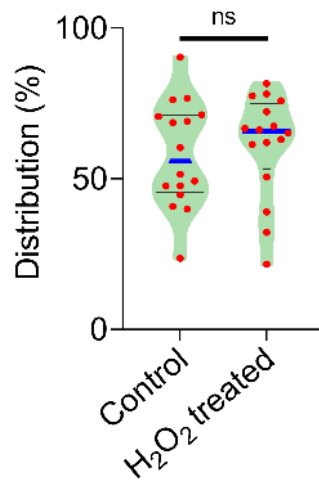

**Fig. S22.** Comparison of the 2.0-3.0 ns fluorescence lifetime distributions in Figs. 4b, 4d.

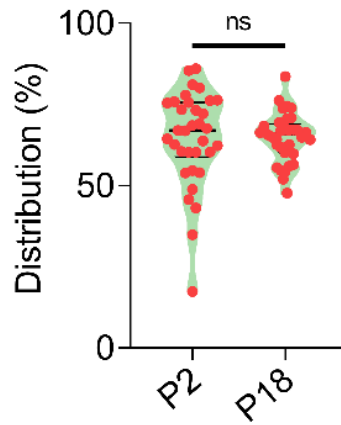

**Fig. S23.** Comparison of the 2.0-3.0 ns fluorescence lifetime distributions in Figs. 4f, 4h.

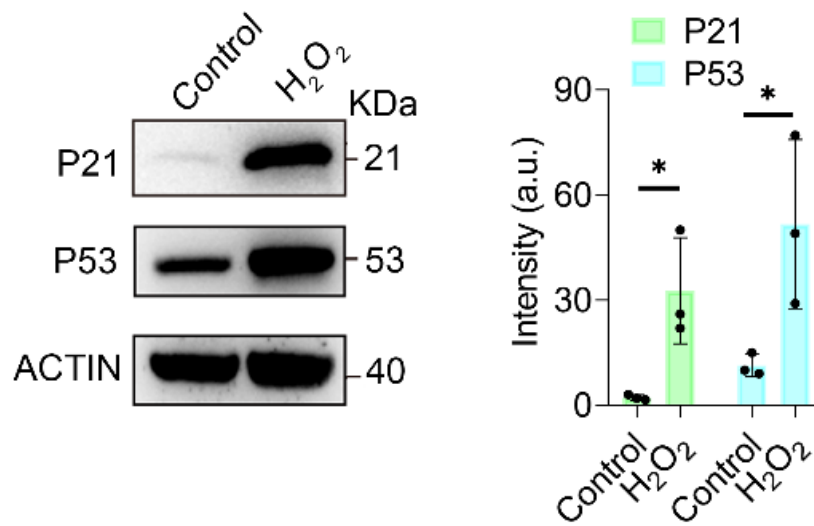

**Fig. S24.** Western blot analysis of the senescence markers P21 and P53 and corresponding densitometric quantification in the oxidative stress-induced senescence model, n = 3.

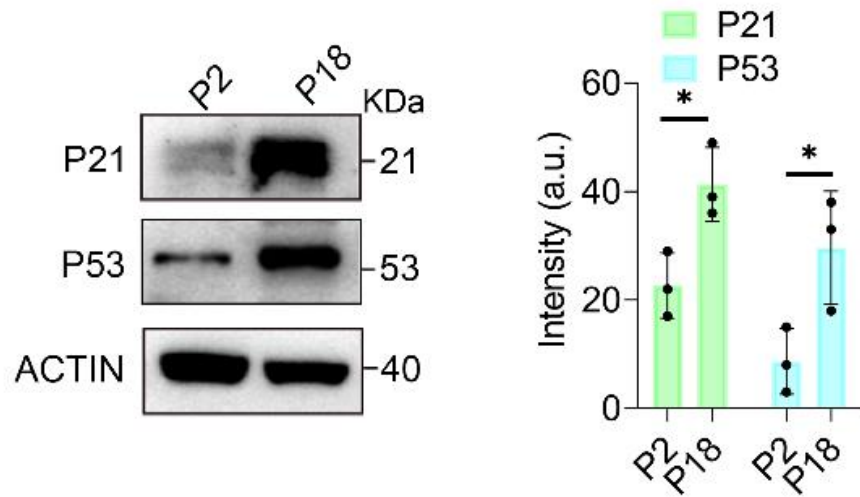

**Fig. S25.** Western blot analysis of the senescence markers P21 and P53 and corresponding densitometric quantification in the replicative senescence model, n = 3.

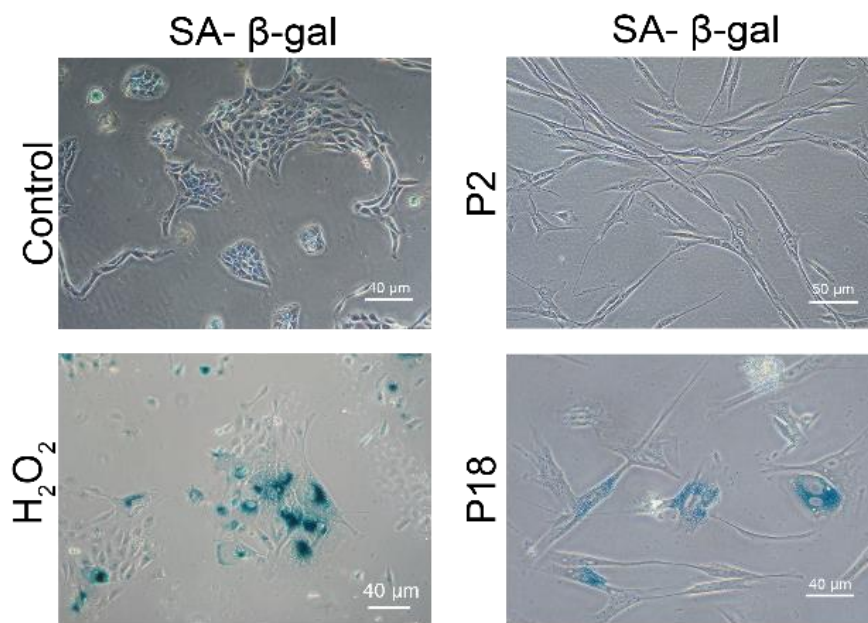

**Fig. S26.** Senescence  $\beta$ -galactosidase staining in H<sub>2</sub>O<sub>2</sub>-treated and replicative senescent models.

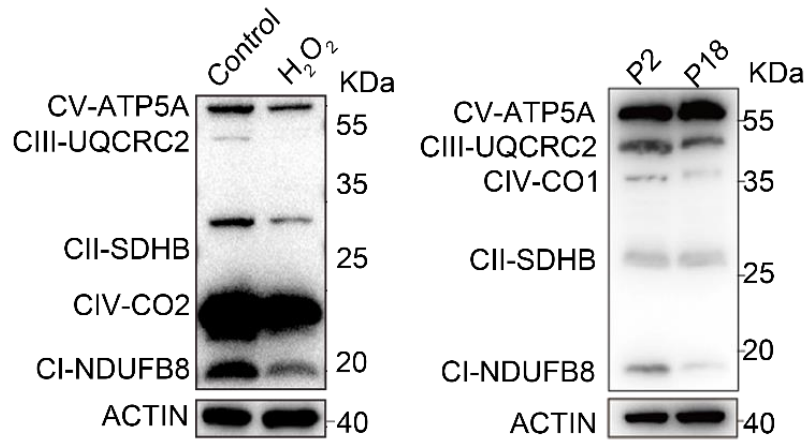

**Fig. S27.** Western blot analysis of oxidative phosphorylation (OXPHOS)-related proteins in  $H_2O_2$ -treated and replicative senescent cells.

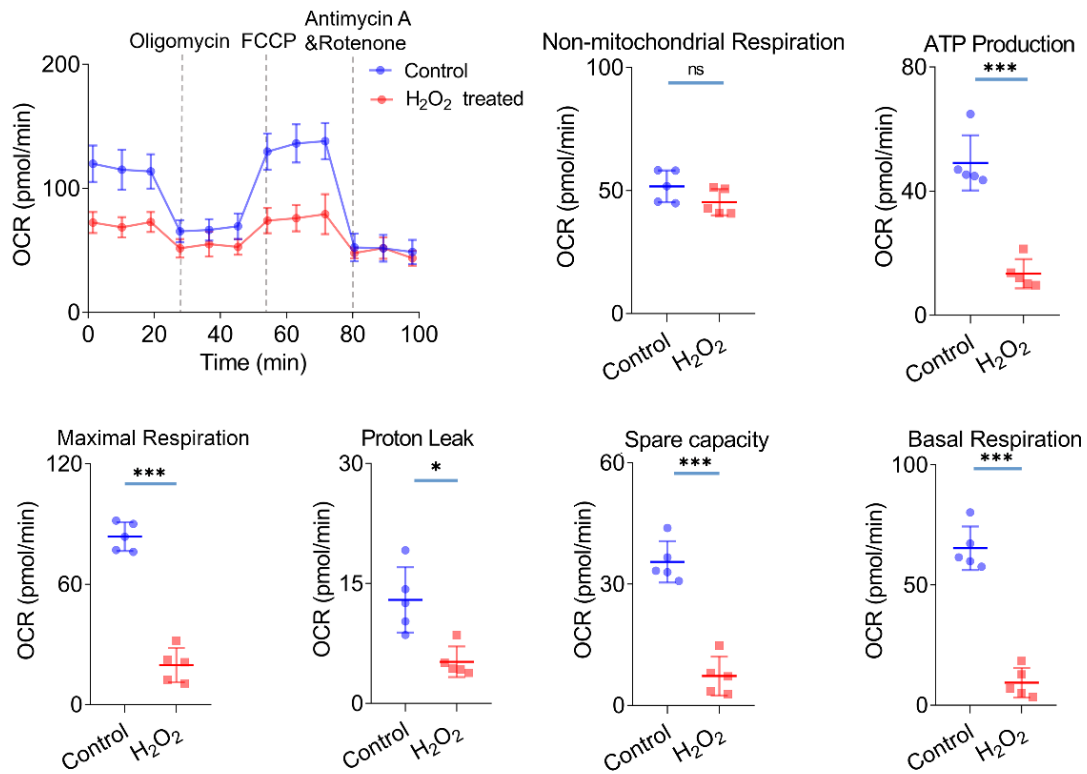

**Fig. S28.** Seahorse analysis reveals impaired mitochondrial respiration in  $H_2O_2$ -treated cells, including reduced basal respiration, ATP-linked respiration, maximal respiration, spare respiration capacity, and proton leak.

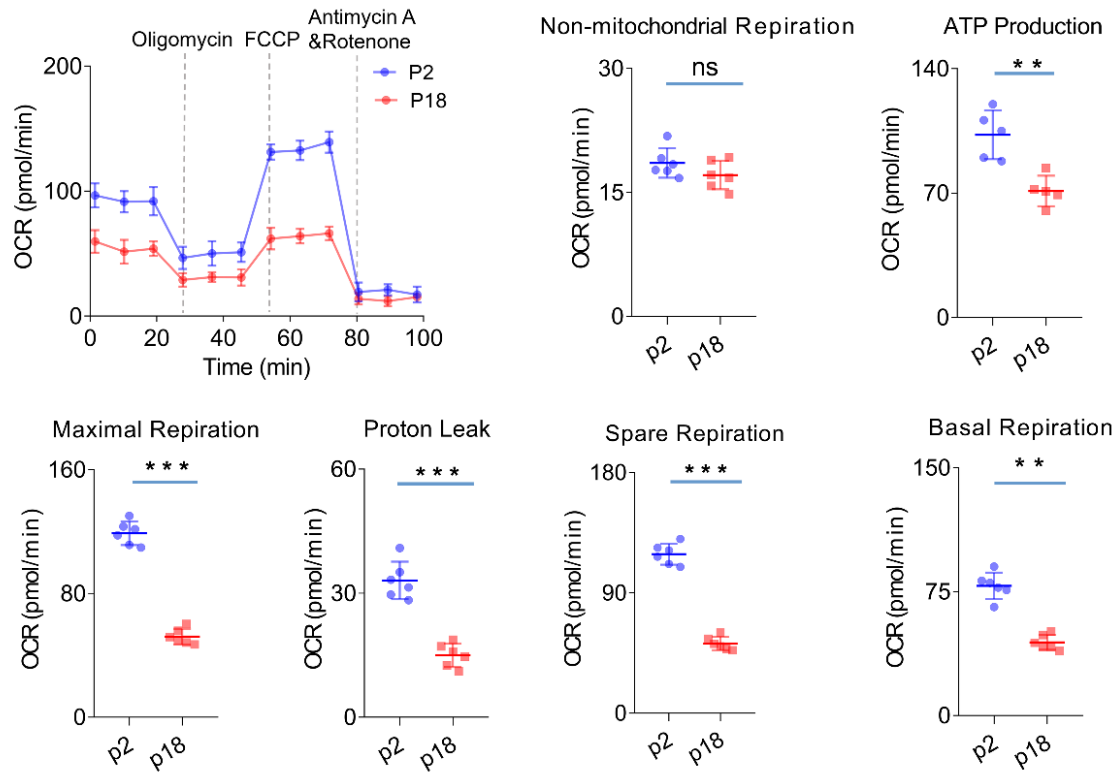

**Fig. S29.** Seahorse analysis reveals impaired mitochondrial respiration in replicated senescent cells, including reduced basal respiration, ATP-linked respiration, maximal respiration, spare respiration capacity, and proton leak.

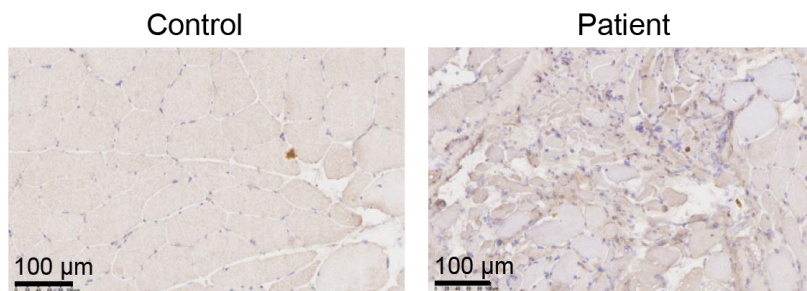

**Fig. S30.** Immunohistochemical staining of tissue sections from controls and patients with *FUS* gene mutations.

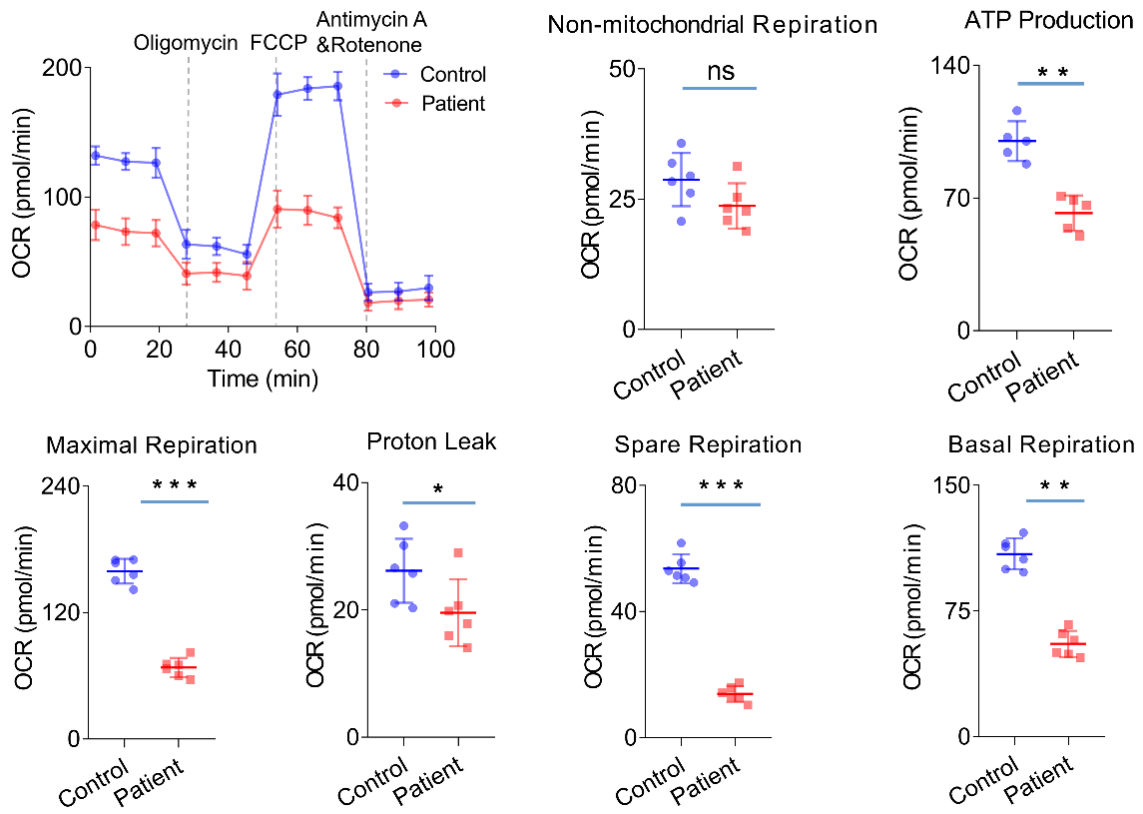

**Fig. S31.** Seahorse analysis reveals impaired mitochondrial respiration in ALS cells, including reduced basal respiration, ATP-linked respiration, maximal respiration, spare respiration capacity, and proton leak.

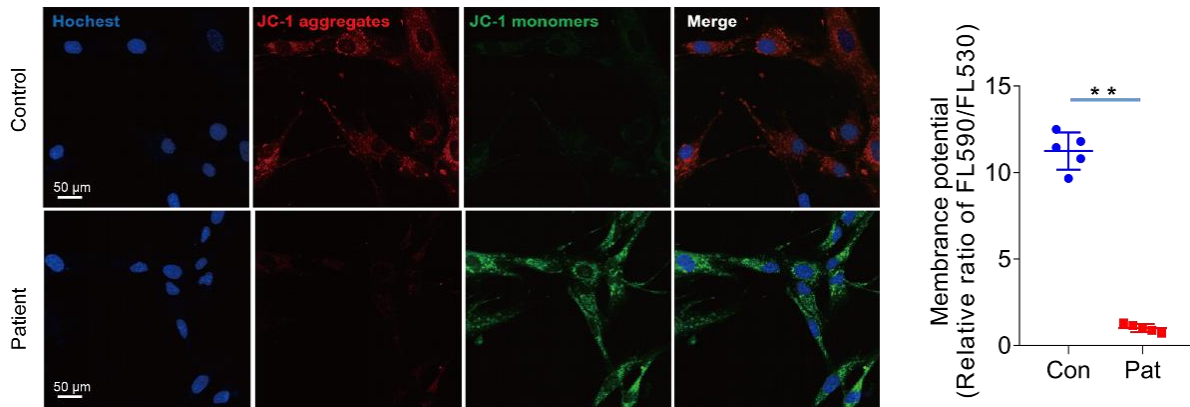

**Fig. S32.** JC-1 staining of normal and *FUS*-mutant patient cells.

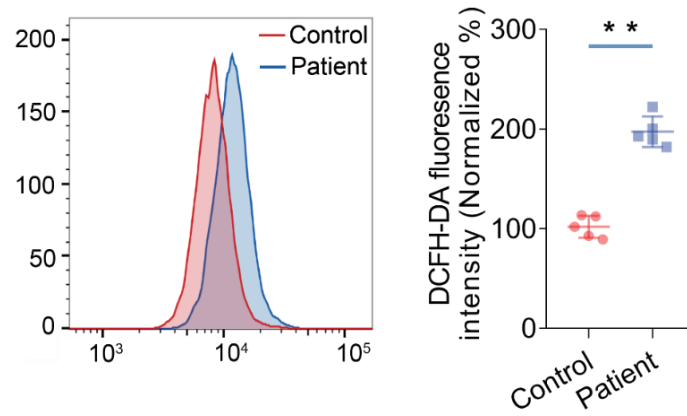

**Fig. S33.** Fluorescence intensity quantification of DCFH-DA measured by flow cytometry.

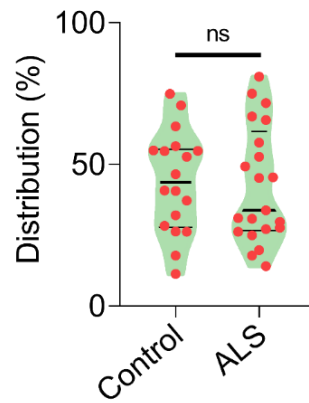

**Fig. S34.** Comparison of the 2.0-3.0 ns fluorescence lifetime distributions in Figs. 6g, 6i.

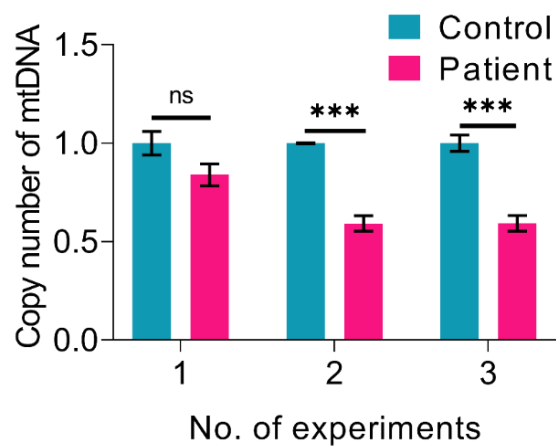

**Fig. S35.** qPCR analysis revealed a reduced mtDNA copy number in ALS patient-derived human skin fibroblasts.

**Table S1.** Fluorescence lifetime fitting parameters of SDMNA in the presence of DNA at a 1:1 DNA-to-SDMNA molar ratio.

| Type                 | Name       | $\tau$ (ns) | $\tau_1$ (ns)/f1 | $\tau_2$ (ns)/f2 |
|----------------------|------------|-------------|------------------|------------------|
| G-quadruplex DNA     | mtDNA9438  | 3.6989      | 1.1488/18.66%    | 4.2839/81.34%    |
|                      | mtDNA1015  | 4.1057      | 1.7249/25.18%    | 4.9070/74.82%    |
|                      | mtDNA16250 | 4.1796      | 1.6606/30.82%    | 5.3018/69.18%    |
|                      | mtDNA6363  | 3.8409      | 1.4464/29.69%    | 4.8521/70.31%    |
|                      | wtTel26    | 4.5576      | 1.2526/8.78%     | 4.8757/91.22%    |
|                      | Tel26      | 4.3284      | 1.4520/11.17%    | 4.6901/88.83%    |
|                      | C-MYC      | 4.0225      | 1.4521/30.42%    | 5.1462/69.58%    |
|                      | 22AG       | 4.0729      | 1.3448/14.18%    | 4.5237/85.82%    |
| Non G-quadruplex DNA | mt15653    | 2.8547      | 1.0922/40.07%    | 4.0332/59.93%    |
|                      | dsDNA      | 0.5549      | 0.7674/50.79%    | 3.3557/49.21%    |
|                      | ss15a      | 2.5318      | 1.2402/36.52%    | 3.2748/63.48%    |
|                      | dt21       | 1.5268      | 0.6278/68.12%    | 3.4477/31.88%    |

**Table S2.** Fluorescence lifetime fitting parameters of SDMNA in the presence of DNA at a 1:1 DNA-to-SDMNA molar ratio.

| Type                 | Name       | $\tau$ (ns) | $\tau_1$ (ns)/f1 | $\tau_2$ (ns)/f2 |
|----------------------|------------|-------------|------------------|------------------|
| G-quadruplex DNA     | mtDNA9438  | 3.8637      | 1.4559/19.50%    | 4.4470/80.50%    |
|                      | mtDNA1015  | 4.3940      | 1.8962/21.93%    | 5.0957/78.07%    |
|                      | mtDNA16250 | 4.5156      | 2.1513/34.02%    | 5.7347/65.98%    |
|                      | mtDNA6363  | 4.2046      | 1.4554/23.21%    | 5.0356/76.79%    |
|                      | wtTel26    | 4.6969      | 1.8177/8.39%     | 4.9606/91.61%    |
|                      | Tel26      | 4.4526      | 1.9191/12.00%    | 4.7981/88.00%    |
|                      | c-Myc      | 4.5663      | 1.7498/24.51%    | 5.4808/75.49%    |
|                      | 22AG       | 4.2707      | 2.0347/12.86%    | 4.6007/87.14%    |
| Non G-quadruplex DNA | mt15653    | 2.9219      | 1.1430/37.84%    | 4.0049/62.16%    |
|                      | dsDNA      | 2.3355      | 1.0714/43.77%    | 3.3195/56.23%    |
|                      | ss15a      | 2.5793      | 1.7173/56.00%    | 3.6764/44.00%    |
|                      | dt21       | 1.6388      | 0.6452/63.17%    | 3.3430/36.83%    |

**Table S3.** Fluorescence lifetime fitting parameters of SDMNA under different conditions.

| Type    |                         | $\tau$ (ns) | $\tau_1$ (ns)/f1 | $\tau_2$ (ns)/f2 |              |
|---------|-------------------------|-------------|------------------|------------------|--------------|
| pH      | 3                       | 0.5687      | 0.0613/80.13%    | 2.6148/19.87%    |              |
|         | 4                       | 0.4057      | 0.0546/85.83%    | 2.5324/14.17%    |              |
|         | 5                       | 0.4716      | 0.0627/84.34%    | 2.6735/15.66%    |              |
|         | 6                       | 0.6627      | 0.0593/76.17%    | 2.5915/23.83%    |              |
|         | 7                       | 0.8150      | 0.0631/68.90%    | 2.4809/31.10%    |              |
|         | 8                       | 0.5589      | 0.0700/78.12%    | 2.3043/21.88%    |              |
|         | 9                       | 0.6153      | 0.0719/73.41%    | 2.1155/26.59%    |              |
|         | 10                      | 0.9268      | 0.0651/62.79%    | 2.3808/37.21%    |              |
|         | Viscosity<br>(Gly-MeOH) | 0%          | 0.1945           | 0.1488/94.70%    | 1.0114/5.30% |
|         |                         | 10%         | 0.2213           | 0.1545/91.04%    | 0.8999/8.96% |
| 20%     |                         | 0.2197      | 0.1204/76.45%    | 0.5422/23.55%    |              |
| 30%     |                         | 0.2339      | 0.1192/66.89%    | 0.4657/33.11%    |              |
| 40%     |                         | 0.2788      | 0.1440/67.92%    | 0.5643/32.08%    |              |
| 50%     |                         | 0.3162      | 0.1517/63.00%    | 0.5962/37.00%    |              |
| 60%     |                         | 0.3996      | 0.1788/58.08%    | 0.7056/41.92%    |              |
| 70%     |                         | 0.5059      | 0.1690/44.23%    | 0.7730/55.77%    |              |
| 80%     |                         | 0.6802      | 0.1882/35.97%    | 0.9566/64.03%    |              |
| 90%     |                         | 0.9551      | 0.3044/30.22%    | 1.2369/69.78%    |              |
| Solvent | 100%                    | 1.8097      | 1.5406/92.38%    | 5.0722/7.62%     |              |
|         | THF                     | 0.3116      | 0.1762/87.63%    | 1.2706/12.37%    |              |
|         | EA                      | 0.2070      | 0.1306/92.86%    | 1.2008/7.14%     |              |
|         | EtOH                    | 0.3667      | 0.1713/79.44%    | 1.1219/20.56%    |              |
|         | MeCN                    | 0.4619      | 0.1533/82.13%    | 1.8804/17.87%    |              |
| HSA     | DMSO                    | 0.2378      | 0.1203/88.21%    | 1.1173/11.79%    |              |
|         | HSA: SDMNA=1:1          | 1.9142      | 0.7218/61.43%    | 3.8132/38.57%    |              |
| BSA     | HSA: SDMNA=2:1          | 2.5195      | 0.8922/49.77%    | 4.1319/50.23%    |              |
|         | BSA: SDMNA=1:1          | 2.2811      | 0.8611/54.90%    | 4.0096/45.10%    |              |
|         | BSA: SDMNA=2:1          | 2.4023      | 0.8820/51.46%    | 4.0140/48.54%    |              |

**Table S4.** List of DNA sequences used in this research.

| Type         | Name       | Sequence                                      |
|--------------|------------|-----------------------------------------------|
|              | mtDNA9438  | 5'-GGC GTA GGT TTG GTC TAG GG-3'              |
|              | mtDNA1015  | 5'-GGG CTT GAT GTG GGG AGG GGT GTT TAA GGG-3' |
|              | mtDNA16250 | 5'-GAA GCG GGG GAG GGG GGG TTT GGT GGA AAT-3' |
|              | mtDNA6363  | 5'-AGG GAC GCG GGC GGG GGA TAT AGG GT-3'      |
| G-quadruplex | wtTel26    | 5'-TTA GGG TTA GGG TTA GGG TTA GGG TT-3'      |
| DNA          | Tel26      | 5'-AAA GGG TTA GGG TTA GGG TTA GGG AA-3'      |
|              | c-Myc      | 5'-TGG GGA GGG TGG GGA GGG TGG GGA AGG-3'     |
|              | 22AG       | 5'-AGG GTT AGG GTT AGG GTT AGG G-3'           |
| Non G-       | mt15653    | 5'-GGG TTA ATC GTG TGA CCG CGG TGG CTG G-3'   |
| quadruplex   | dsDNA      | 5'-AGA GGA GAG CTC T-3'                       |
| DNA          | ss15a      | 5'-CGC GCG TTT CGC GCG-3'                     |
|              | dt21       | 5'-AAA AAA AAA AAA AAA AAA AAA-3'             |

**Table S5.** Primer sequences used in mtDNA copy number and mtG4DNA content.

| <b>Name</b>                                    | <b>Sequence</b>                          |
|------------------------------------------------|------------------------------------------|
| COX3 (mtDNA, for copy number)                  | Forward: 5'-CAGCCCATGACCCCTAACAG-3'      |
|                                                | Reverse: 5'-TACATCGCGCCATCATTGGT-3'      |
| GAPDH (nuclear DNA, for copy number)           | Forward: 5'-CAGGTTGTCTCCTGCGACTTC-3'     |
|                                                | Reverse: 5'-GGGTGGTCCAGGGTTTCTTAC-3'     |
| Homo-MT-ND6-112 (G4-enriched mtDNA region)     | Forward: 5'-AATCATACAAAGCCCCGCA-3'       |
|                                                | Reverse: 5'-GGGGTGGTGGTTGTGGTAAA-3'      |
| Homo-MT-ND6-130 (G4-enriched mtDNA region)     | Forward: 5'-CCAATCCTACCTCCATCGCTAA-3'    |
|                                                | Reverse: 5'-TTAGGGGGAATGATGGTTGTCT-3'    |
| Homo-MT-ATP6-141 (non-G4 mtDNA control region) | Forward: 5'- ACAACTAACCTCCTCGGACTC-3'    |
|                                                | Reverse: 5'- GTGGGCTAGGGCATTTTTAATC-3'   |
| Mus-MT-ND6-161 (G4-enriched mtDNA region)      | Forward: 5'- TGGTTGTCTTGGGTTAGCATT-3'    |
|                                                | Reverse: 5'- CAAACACAACCAACATCCCCC-3'    |
| Mus-MT-ND6-84 (G4-enriched mtDNA region)       | Forward: 5'- GTTGGAAGGAGGGATTGGGG-3'     |
|                                                | Reverse: 5'- CCCGCAAACAAAGATCACCC-3'     |
| Mus-MT-ATP6-95 (non-G4 mtDNA control region)   | Forward: 5'- TGCCTCATTCATTACCCCAACAAT-3' |
|                                                | Reverse: 5'- TTAGGCGTTTTGAGGATGGGAA-3'   |
